# Supplementary material for: Efficacy of EHEC gold nanoparticle vaccines evaluated with the Shiga toxin-producing Citrobacter rodentium mouse model
Source: PubMed Central journal article supplement (PMC10783022; doi:10.1128/spectrum.02261-23), 2023-12-04
Supplement: spectrum.02261-23-s0001.pdf [file spectrum.02261-23-s0001.pdf]

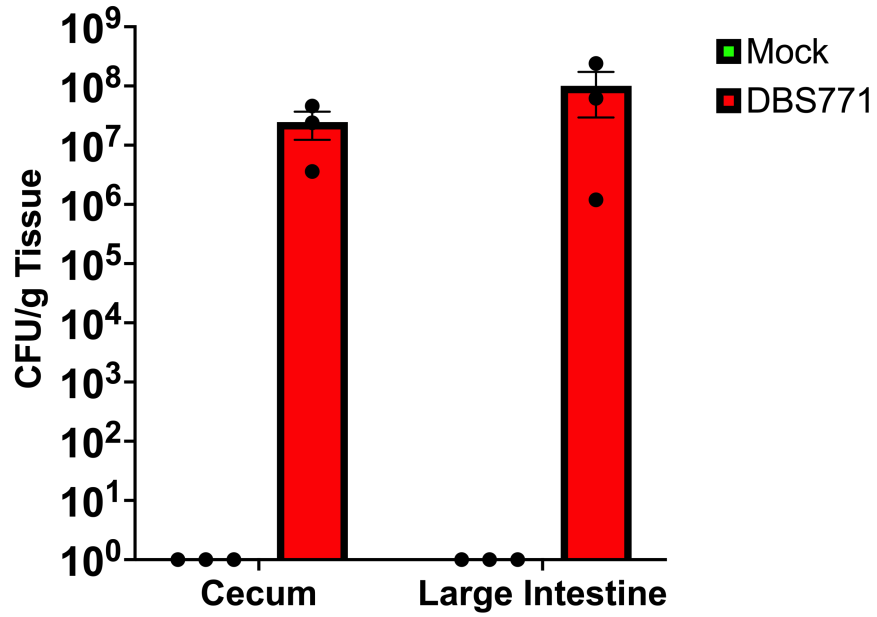

**Figure S1. Organ burden following infection of 10-12-week-old mice with Stx2d-negative *C. rodentium* via the feeding route.** Ceca and large intestines were collected from half of the mice infected with *C. rodentium* DBS771 or PBS (mock) at 14 dpi. Viable counts were expressed as CFU/g of tissue, and the average CFU ( $\pm$ SEM) of 3 mice is shown.

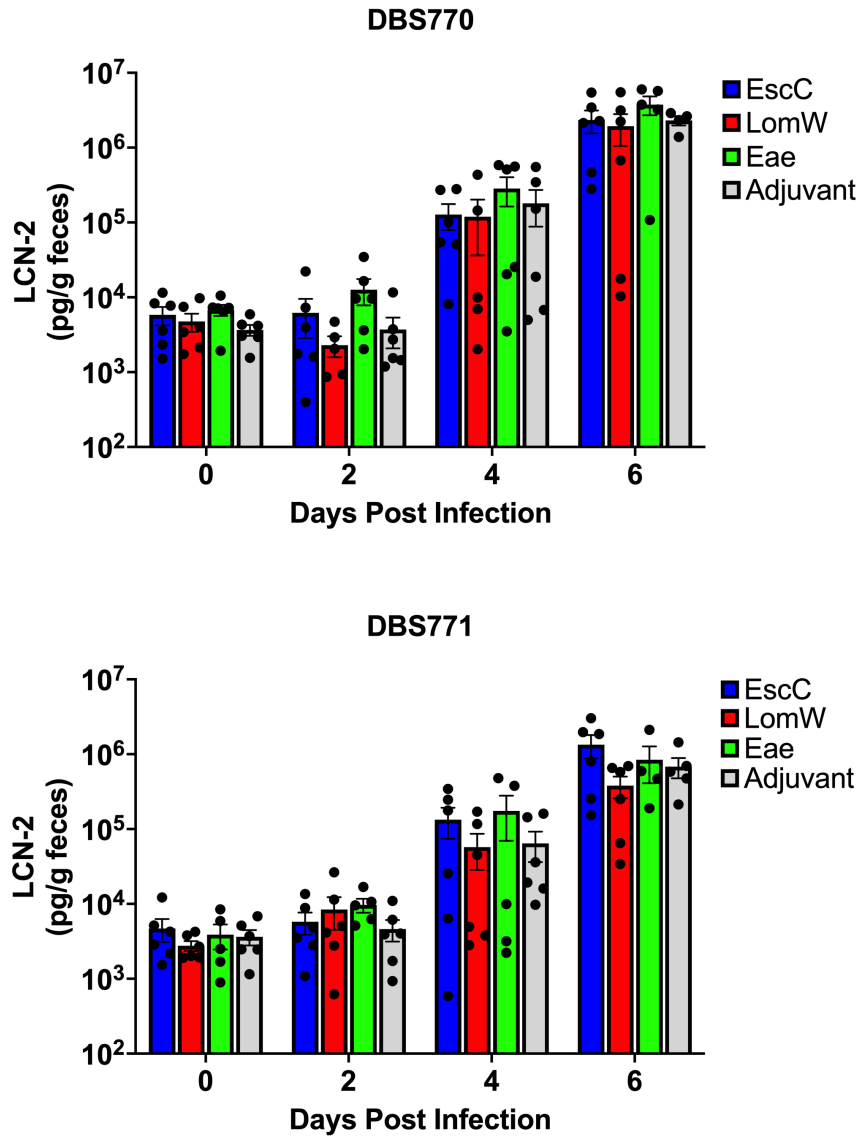

**Figure S2. LCN-2 concentrations in feces of AuNP-vaccinated mice after *C. rodentium* infection.** LCN-2 concentrations in the feces of mice that were vaccinated with either AuNP-EscC, AuNP-LomW, AuNP-Eae, or adjuvant-only treated, and then infected with either DBS770 or DBS771. Feces were collected prior to infection and at 2, 4 and 6 dpi. Each dot represents an individual mouse (starting with  $n=6$  mice/group), and the bars indicate the average ( $\pm$ SEM).
